# Supplementary material
Source: HighWire-hosted journal article supplement (https://openheart.bmj.com/content/4/2/e000653)
Supplement: inline-supplementary-material-1 [file inline-supplementary-material-1.pdf]

## Appendix 1 Adult Inpatient Drug Chart

### Risk Assessment for Venous Thromboembolism (VTE) for ALL adult patients admitted to hospital

(For pregnancy related admission see separate guidelines) **Risk assessment completed at Pre-assessment**

|        | Assess mobility for all patients admitted to hospital - tick one box                          | ✓ | Action                                                                        |
|--------|-----------------------------------------------------------------------------------------------|---|-------------------------------------------------------------------------------|
| Step 1 | Surgical patient                                                                              |   | Assess for thrombosis risk and bleeding risk (Step 2 and 3)                   |
|        | Medical patient expected to have ongoing reduced mobility relative to normal state            |   |                                                                               |
|        | Medical patient <b>NOT</b> expected to have ongoing reduced mobility relative to normal state |   | VTE prophylaxis not required<br><span style="color: red;">Go to Step 4</span> |

| Assess thrombosis risk - tick all that apply (✓) Any tick should prompt thromboprophylaxis |                                                                                                 |  |       |      |                                                                                                                                                           |       |      |
|--------------------------------------------------------------------------------------------|-------------------------------------------------------------------------------------------------|--|-------|------|-----------------------------------------------------------------------------------------------------------------------------------------------------------|-------|------|
| Step 2                                                                                     | Patient related                                                                                 |  | First | 72hr |                                                                                                                                                           | First | 72hr |
|                                                                                            | Active cancer or cancer treatment                                                               |  |       |      | Use of hormone replacement therapy                                                                                                                        |       |      |
|                                                                                            | Age >60                                                                                         |  |       |      | Use of oestrogen-containing contraceptive therapy                                                                                                         |       |      |
|                                                                                            | Dehydration                                                                                     |  |       |      | Varicose veins with phlebitis                                                                                                                             |       |      |
|                                                                                            | Known thrombophilias                                                                            |  |       |      | Critical Care admission                                                                                                                                   |       |      |
|                                                                                            | Obesity (BMI >30kg/m <sup>2</sup> )                                                             |  |       |      | Significant medical comorbidities (eg. heart disease, metabolic, endocrine or respiratory pathologies; acute infectious disease; inflammatory conditions) |       |      |
|                                                                                            | Personal history or first-degree relative with a history of VTE                                 |  |       |      |                                                                                                                                                           |       |      |
|                                                                                            | Admission related                                                                               |  |       |      |                                                                                                                                                           |       |      |
|                                                                                            | If total anaesthetic + surgery time > 90 minutes                                                |  |       |      | Significant reduction in mobility for 3 days or more                                                                                                      |       |      |
|                                                                                            | If surgery involving pelvis or lower limb with a total anaesthetic + surgical time > 60 minutes |  |       |      | If acute surgical admission with inflammatory or intra-abdominal condition                                                                                |       |      |

| Assess bleeding risk (re-assess regularly) - tick all that apply (✓)                                                            |                                                                                                              |  |       |      |                                                                                                                                                                                                        |       |      |
|---------------------------------------------------------------------------------------------------------------------------------|--------------------------------------------------------------------------------------------------------------|--|-------|------|--------------------------------------------------------------------------------------------------------------------------------------------------------------------------------------------------------|-------|------|
| If bleeding risks identified pharmacological prophylaxis may be contra-indicated, discuss with senior doctor before prescribing |                                                                                                              |  |       |      |                                                                                                                                                                                                        |       |      |
| Step 3                                                                                                                          | Patient related                                                                                              |  | First | 72hr |                                                                                                                                                                                                        | First | 72hr |
|                                                                                                                                 | Active bleeding                                                                                              |  |       |      | Thrombocytopenia (platelets < 50x10 <sup>9</sup> /l)                                                                                                                                                   |       |      |
|                                                                                                                                 | Acquired bleeding disorders (e.g. acute liver failure)                                                       |  |       |      | Uncontrolled systolic hypertension (≥ 230 mmHg)                                                                                                                                                        |       |      |
|                                                                                                                                 | Concurrent use of anticoagulants (e.g. warfarin with INR > 2, therapeutic dose of enoxaparin or rivaroxaban) |  |       |      | Untreated inherited bleeding disorders (such as haemophilia or Von Willebrand's disease)                                                                                                               |       |      |
|                                                                                                                                 | Acute stroke (< 3 months ago or risk of CNS bleeding)                                                        |  |       |      |                                                                                                                                                                                                        |       |      |
|                                                                                                                                 | Admission related                                                                                            |  |       |      |                                                                                                                                                                                                        |       |      |
|                                                                                                                                 | Neurosurgery, spinal surgery or eye surgery (except cataract surgery)                                        |  |       |      | Lumbar puncture/epidural/spinal anaesthesia within the previous 4hrs or expected within the next 12hrs (if pharmacological prophylaxis is indicated clearly document timing of dose and/or start date) |       |      |
|                                                                                                                                 | Other procedure with high bleeding risk                                                                      |  |       |      |                                                                                                                                                                                                        |       |      |

| Assessment completed by (can be any trained healthcare worker) |            |           |              |       |       |      |
|----------------------------------------------------------------|------------|-----------|--------------|-------|-------|------|
| Step 4                                                         | Assessment | Signature | Name (PRINT) | Grade | Bleep | Date |
|                                                                | First      |           |              |       |       |      |
|                                                                | 72 hour    |           |              |       |       |      |

| Consider contra-indications tick if present (✓) |                                                                                      |                                     |                   |                 | First         | 72hr |  |
|-------------------------------------------------|--------------------------------------------------------------------------------------|-------------------------------------|-------------------|-----------------|---------------|------|--|
| Step 5                                          | Contra-indications to pharmacological prophylaxis (consider anti-embolism stockings) |                                     |                   |                 |               |      |  |
|                                                 | Contra-indications to anti-embolism stockings (see below)                            |                                     |                   |                 |               |      |  |
|                                                 | Peripheral arterial disease                                                          | Peripheral arterial bypass grafting | Recent skin graft | Cardiac failure | Known Allergy |      |  |
| Peripheral neuropathy                           | Severe dermatitis or gangrene                                                        | Severe leg oedema                   | Leg deformity     |                 |               |      |  |

| Guidelines used to risk assess: Surgical <input type="checkbox"/> Orthopaedic <input type="checkbox"/> Obstetric <input type="checkbox"/> Other.....(specify) |                                                    |       |      |                              |       |      |
|---------------------------------------------------------------------------------------------------------------------------------------------------------------|----------------------------------------------------|-------|------|------------------------------|-------|------|
| Step 6                                                                                                                                                        | Record treatment decisions tick all that apply (✓) |       |      |                              |       |      |
|                                                                                                                                                               | None - cross off enoxaparin from chart (drug 1)    | First | 72hr | Unfractionated Heparin (UFH) | First | 72hr |
|                                                                                                                                                               | Enoxaparin                                         |       |      | Rivaroxaban                  |       |      |
|                                                                                                                                                               | Intermittent pneumatic compression or footpumps    |       |      | Anti-embolism stockings      |       |      |

| Step 7 Write prescription                                                                           |  |
|-----------------------------------------------------------------------------------------------------|--|
| Ensure selected thromboprophylaxis is prescribed at an appropriate dose for the patient             |  |
| Consider eGFR and body weight if applicable (see 'Enoxaparin VTE Dosing Guidance' on opposite page) |  |

| Monitoring patients on enoxaparin                                                                                                                                                                                                                                                                                                                                   |  |
|---------------------------------------------------------------------------------------------------------------------------------------------------------------------------------------------------------------------------------------------------------------------------------------------------------------------------------------------------------------------|--|
| <b>Heparin Induced Thrombocytopenia (HIT):</b> For inpatients check baseline platelet count and then every 2-4 days until day 14. As a minimum for extended prophylaxis post-discharge check once between 4-7 days and again after 10-14 days of enoxaparin treatment. If platelets fall by more than 50% of baseline stop enoxaparin and discuss with haematology. |  |
| <b>Hyperkalaemia:</b> monitor serum potassium in at risk patients (those with diabetes mellitus, chronic renal failure, pre-existing metabolic acidosis or taking potassium sparing drugs) before starting treatment and recheck regularly                                                                                                                          |  |

All patients to be periodically reassessed during inpatient stay as risk factors or contraindications may change.  
**Review assessment at 24 hrs then reassess every 72 - 96 hrs or, as or when patient's condition changes.**
